# Supplementary material for: Sensing of ultra-ppm level NO2 gas via synergistic effects of Cr doping and e-beam irradiation in WO3 nanostructures
Source: Royal Society of Chemistry journal article supplement (doi:10.1039/d5ma00330j), 2025-01-01
Supplement: d5ma00330j1.pdf [file d5ma00330j1.pdf]

## Supplementary Information

### Sensing of ultra-ppm level NO<sub>2</sub> gas via synergistic effects of Cr Doping and E-Beam Irradiation in WO<sub>3</sub> nanostructures

Anusha<sup>1</sup>, Poornesh P<sup>1\*</sup>, Vikash Chandra Petwal<sup>2</sup>, Vijay Pal Verma<sup>2</sup>, Jishnu Dwivedi<sup>2</sup>

<sup>1</sup>Department of Physics, Manipal Institute of Technology, Manipal Academy of Higher Education, Manipal, Karnataka, 576104, INDIA

<sup>2</sup>Industrial Accelerator Section, PSIAD, Raja Ramanna Centre for Advanced Technology, Indore 452012, M.P., INDIA

\* Corresponding author.

Email addresses: [poornesh.p@manipal.edu](mailto:poornesh.p@manipal.edu), [poorneshp@gmail.com](mailto:poorneshp@gmail.com) (Poornesh P)

#### S1. Structural insights from XRD

Various structural parameters, including crystallite size, strain, and dislocation density, were calculated using the eqns. (S1)-(S3). Scherrer's equation [1] was utilized to determine the crystallite size (D), expressed as follows:

$$D = \frac{0.9 \lambda}{\beta \cos \theta} \quad (S1)$$

$\beta$  denotes full-width half maximum (FWHM),  $\theta$  is angle between the incident X-ray and the crystal plane, and  $\lambda$  is given as 0.154 nm for Cu-K $\alpha$  source.

Dislocation density ( $\delta$ ) and strain ( $\epsilon$ ) [2,3] was computed using the following formulae,

$$\delta = \frac{1}{D^2} \quad (S2)$$

$$\epsilon = \frac{\beta}{4 \tan \theta} \quad (S3)$$

#### S2. Bandgap studies

Absorbance studies of the Samples A, B and C were performed using UV-Visible spectrophotometer. Fig. S1(a & b) indicates the absorbance spectra in the visible region and

corresponding Tauc's plot. Band gap values of the films were evaluated via Tauc's relation, wherein  $(\alpha h\nu)^2$  is plotted against incident photon energy [4]. Energy band gaps were estimated as 3.22 eV, 3.10 eV and 3.13 eV for WO<sub>3</sub> (Sample A), Cr-WO<sub>3</sub> (Sample B), and EBI Cr-WO<sub>3</sub> (Sample C), films, respectively.

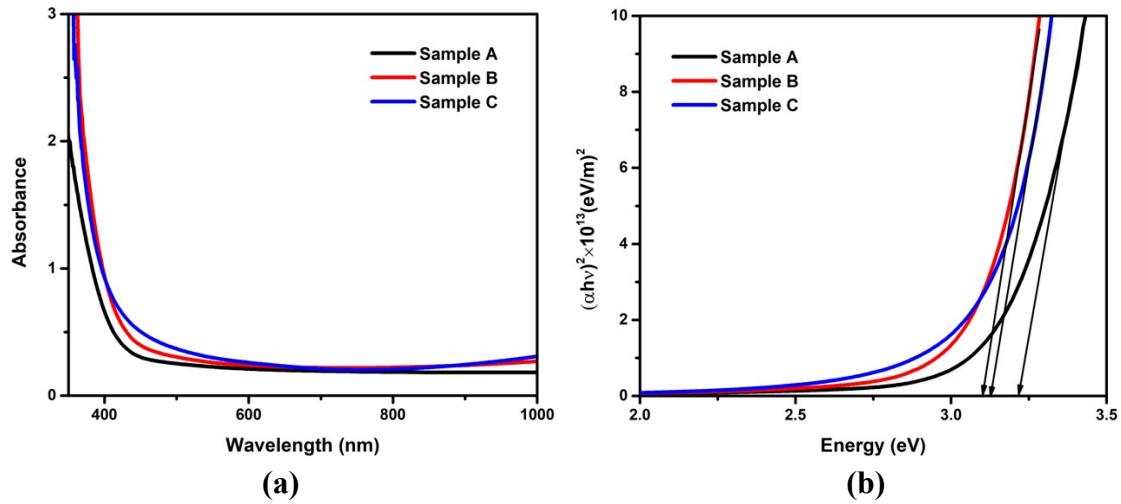

Fig. S1. (a) Absorbance spectra (b) Tauc's plot of Samples A, B and C.

### S3. NO<sub>2</sub> sensing measurements

The theoretical limit of detection (LOD) for the EBI Cr-WO<sub>3</sub> sensor was calculated by plotting the sensor response against various NO<sub>2</sub> concentrations using linear regression ( $y = a + bx$ ) and applying eqn. (S4) [5].

$$\text{LOD} = 3\sigma_D/s \quad (S4)$$

Where,  $\sigma_D$  is the standard deviation of the y-intercept and  $s$  is the slope of the calibration curve. The results indicated that the theoretical limit of detection for the EBI Cr-WO<sub>3</sub> (Sample C) sensor was 0.4 ppm.

Table S1. Comparison of NO<sub>2</sub> sensing data with literature.

| Material                                                 | Method                                  | Gas Conc. (ppm) | Operating Temperature (°C) | Sensor Response | Reference    |
|----------------------------------------------------------|-----------------------------------------|-----------------|----------------------------|-----------------|--------------|
| In <sub>2</sub> O <sub>3</sub> decorated WO <sub>3</sub> | Hydrothermal & Thermal evaporation      | 200             | 300                        | 28              | [6]          |
| Mesoporous WO <sub>3</sub>                               | One-step precipitation                  | 200             | 250                        | 99.78           | [7]          |
| Ag doped WO <sub>3</sub>                                 | Soft chemical route                     | 100             | 200                        | 1.5             | [8]          |
| WO <sub>3</sub> nanoflowers                              | Hydrothermal                            | 100             | 200                        | 2.25            | [9]          |
| Annealed + Laser irradiated WO <sub>3</sub>              | RF Sputtering                           | 0.5             | 200                        | 6.7             | [10]         |
| EB irradiated Pd-rGO                                     | Solution processing & Thermal annealing | 10              | RT                         | 1.05            | [11]         |
| EB irradiated Cr-WO <sub>3</sub>                         | Spray pyrolysis                         | 5               | 200                        | 3.43            | Present work |

## References

- [1] Scherrer P. Bestimmung der Grösse und der inneren Struktur von Kolloidteilchen mittels Röntgenstrahlen"[Determination of the size and internal structure of colloidal particles using X-rays]. Nachr Ges Wiss Goettingen, Math-Phys Kl 1918;26:98–100.
- [2] Bindu P, Thomas S. Estimation of lattice strain in ZnO nanoparticles: X-ray peak profile analysis. Journal of Theoretical and Applied Physics 2014;8:123–34.
- [3] Kumar N, Sidhu GK, Kumar R. Correlation of synthesis parameters to the phase segregation and lattice strain in tungsten oxide nanoparticles. Mater Res Express 2019;6. <https://doi.org/10.1088/2053-1591/ab12a5>.

- [4] Makuła P, Pacia M, Macyk W. How To Correctly Determine the Band Gap Energy of Modified Semiconductor Photocatalysts Based on UV-Vis Spectra. *Journal of Physical Chemistry Letters* 2018;9:6814–7. <https://doi.org/10.1021/acs.jpcclett.8b02892>.
- [5] Liu H, Shen W, Chen X. A room temperature operated ammonia gas sensor based on Ag-decorated TiO<sub>2</sub> quantum dot clusters. *RSC Adv* 2019;9:24519–26. <https://doi.org/10.1039/c9ra05439a>.
- [6] Nam B, Ko T-K, Hyun S-K, Lee C. NO<sub>2</sub> sensing properties of WO<sub>3</sub>-decorated In<sub>2</sub>O<sub>3</sub> nanorods and In<sub>2</sub>O<sub>3</sub>-decorated WO<sub>3</sub> nanorods. *Nano Converg* 2019;6:40. <https://doi.org/10.1186/s40580-019-0205-2>.
- [7] Zhang C, Hong X, Jiang C, Luo F, Wan B, Zheng X. A special gas sensor based on mesoporous WO<sub>3</sub> sensing electrode in medium low temperature for NO<sub>2</sub> detection. *Mater Lett* 2022;306:130927. <https://doi.org/10.1016/j.matlet.2021.130927>.
- [8] Pandey NK, Roy A, Tiwari K, Mishra A, Rai A, Jayaswal S, Rashmi, Madhvendra, Govindan A. NO<sub>2</sub> sensing studies of WO<sub>3</sub> and Ag doped WO<sub>3</sub> prepared through sol-gel route. 2012 1st International Symposium on Physics and Technology of Sensors (ISPTS-1), 2012, p. 342–5. <https://doi.org/10.1109/ISPTS.2012.6260963>.
- [9] Hingangavkar GM, Navale YH, Nimbalkar TM, Mulik RN, Patil VB. Hydrothermally engineered WO<sub>3</sub> nanoflowers: A selective detection towards toxic NO<sub>2</sub> gas. *Sens Actuators B Chem* 2022;371:132584. <https://doi.org/10.1016/j.snb.2022.132584>.
- [10] Zhang C, Van Overschelde O, Boudiba A, Snyders R, Olivier M-G, Debligny M. Improvement of sensing characteristics of radio-frequency sputtered tungsten oxide films through surface modification by laser irradiation. *Mater Chem Phys* 2012;133:588–91. <https://doi.org/10.1016/j.matchemphys.2012.01.116>.

- [11] Choi MS, Mirzaei A, Bang JH, Oum W, Kim SS, Kim HW. Improvement of NO<sub>2</sub> Sensing Properties in Pd Functionalized Reduced Graphene Oxides by Electron-Beam Irradiation. *Front Mater* 2019;6:197. <https://doi.org/10.3389/fmats.2019.00197>.
